# Supplementary material
Source: PubMed Central journal article supplement (PMC6757176)
Supplement: jin-0010-0339-s01.pdf [file jin-0010-0339-s01.pdf]

**A.**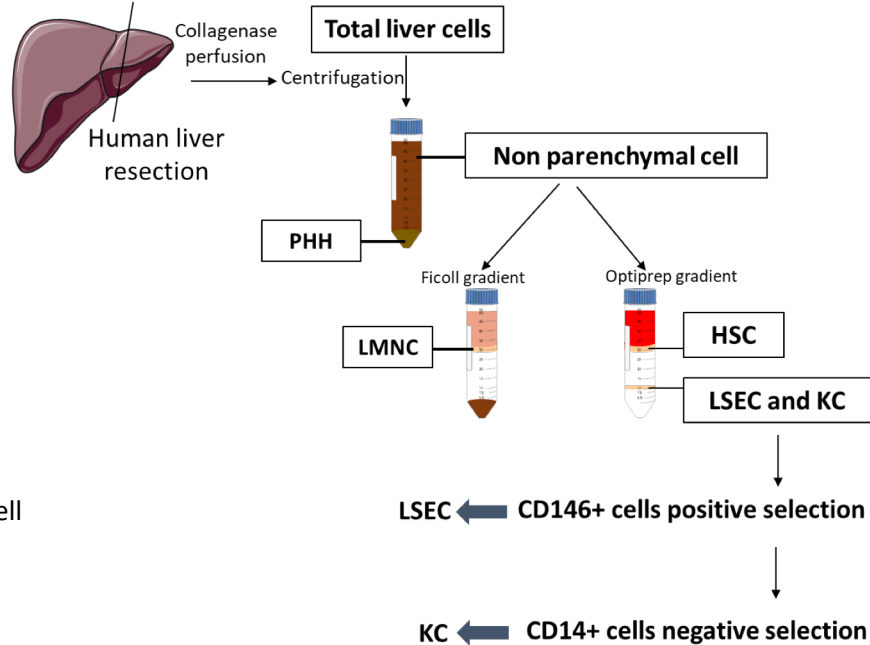

PHH: primary human hepatocyte

LMNC: liver mononuclear cell

HSC: hepatic stellate cell

LSEC: liver sinusoidal endothelial cell

KC: kupffer cell

**B.**

| Cells (million) | Donor 1 | Donor 2 | Donor 3 | Donor 4 | Donor 5 | Donor 6 | Donor 7 | Donor 8 | Donor 9 | Donor 10 | Donor 11 | Donor 12 |
|-----------------|---------|---------|---------|---------|---------|---------|---------|---------|---------|----------|----------|----------|
| PHH             | 1000    | 1600    | 14      | 300     | 1280    | 1500    | 1429    | 1000    | 150     | 1500     | 850      | 80       |
| LMNC            | N/A     | 1710    | N/A     | N/A     | 1626    | N/A     | 400     | 110     | 36      | N/A      | N/A      | 150      |
| HSC             | 25      | 40      | N/A     | N/A     | N/A     | N/A     | N/A     | 12      | 10      | 15       | 7        | 20       |
| LSEC            | N/A     | 70      | 2       | 53      | 50      | 80      | N/A     | 44      | 2       | 25       | 6,5      | 6        |
| KC              | 125     | 95      | 12      | 60      | 90      | 200     | 220     | 28      | 20      | 59       | 15       | 14       |
| Photos          |         |         |         | N/A     |         |         |         |         | N/A     |          |          |          |

**C.**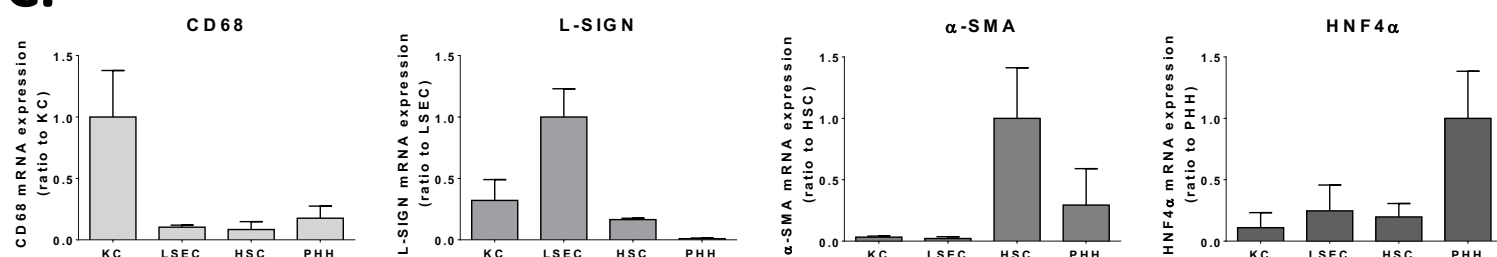**D.**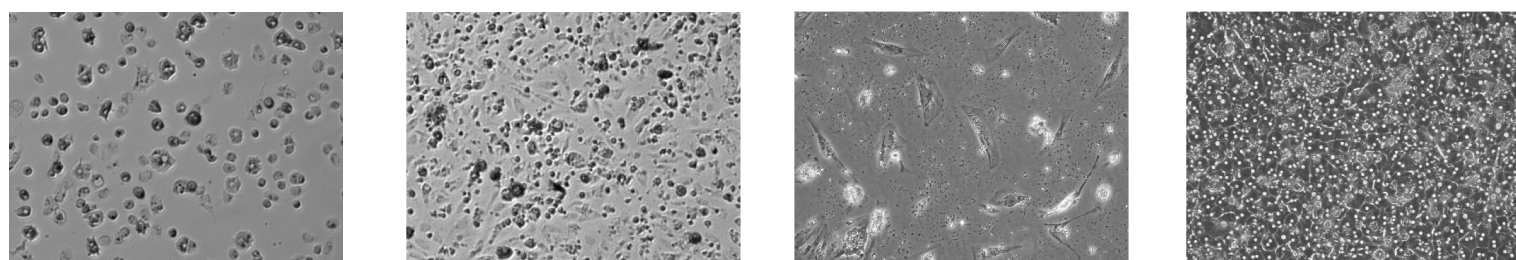

**Supplementary Figure 1: Isolation method and purity of liver cells.** (A) Schematic representation of the experimental procedure to purify PHH, LMNC, HSC, LSEC, and KC from liver resection. (B) Photos of the liver and yield of purified cells for the different donors used (N/A: data not available). (C) PHH, LSEC, HSC and KC were purified from three different donors and cultured for 24h. mRNAs were extracted and expression level of the indicated mRNA were analysed by RT-qPCR. Data are presented as mean  $\pm$  standard deviation of three different experiments (three different donors). (D) Representative photos of the different type of purified liver cells.

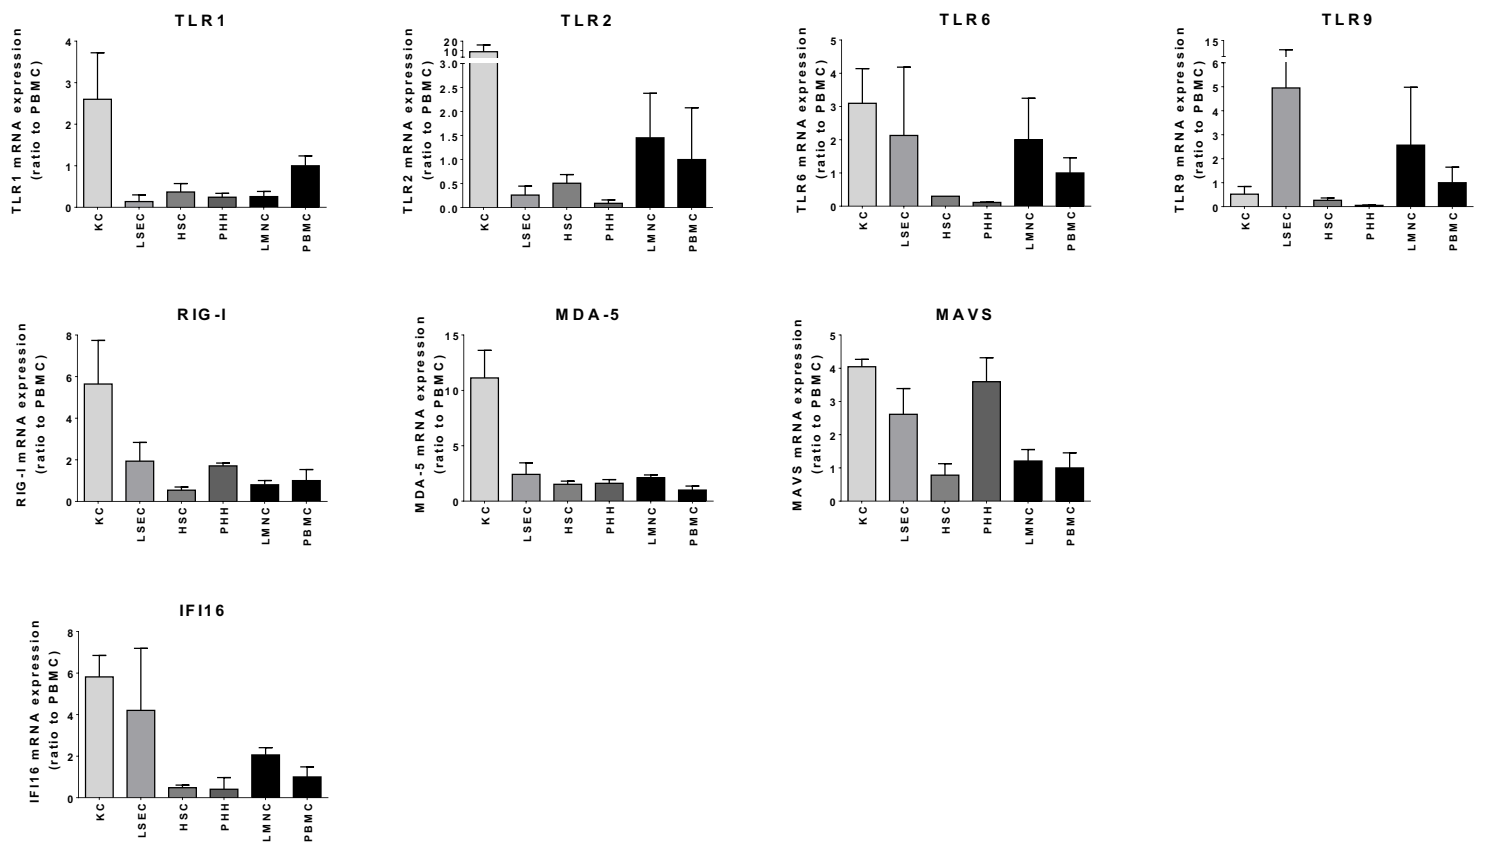

**Supplementary Figure 2: TLR1, TLR2, TLR6, TLR9, RIG-I, MDA-5, and IFI16 mRNA expression in liver primary cells.** PHH, LSEC, HSC, KC, LMNC and PBMC were purified from different donors and cultured for 24h. RNAs were extracted and expression level of the indicated mRNA were analysed by RT-qPCR. Data are presented as mean +/- standard deviation of three different experiments (three different donors).

| Gene                    | Full name                                                        | Forward                   | Reverse                  |
|-------------------------|------------------------------------------------------------------|---------------------------|--------------------------|
| <b>RPLP0</b>            | ribosomal protein lateral stalk subunit P0                       | CACCATTGAAATCCTGAGTGATGT  | TGACCAGCCCAAAGGAGAAG     |
| <b>GUS</b>              | β-glucuronidase                                                  | CGTGGTTGGAGAGCTCATTTGGAA  | ATTCCCCAGCACTCTCGTCCGT   |
| <b>TLR1</b>             | Toll like receptor 1                                             | ACAAGCAGGTTGCTTTGTGTT     | GAGGGCCTGGTACCCCTATT     |
| <b>TLR2</b>             | Toll like receptor 2                                             | CTCTGGTGCTGACATCCAATGGAA  | GGGCTTGAACCAGGAAGACGATAA |
| <b>TRL3</b>             | Toll like receptor 3                                             | AGAAGGTTTTCGGGCCAGCTTT    | TGACAGCTCAGGGATGTTGGTATG |
| <b>TLR4</b>             | Toll like receptor 4                                             | CACACCAGAGTTGCTTTCAATGGC  | AGAGAGGTCCAGGAAGGTCAAGTT |
| <b>TLR5</b>             | Toll like receptor 5                                             | CCTGACCTTATAGTTGCCAGCTT   | TCCGACATCTCCCTGGATGCTAA  |
| <b>TLR6</b>             | Toll like receptor 6                                             | ACCCATTCCACAGAACAGCATTCC  | TCCTTGGGCCACTGCAAATAAGTC |
| <b>TLR7</b>             | Toll like receptor 7                                             | CCAACTGTTCAGAAGCCTCAAGA   | CCAGATATCGCAACTGGAAGGCAT |
| <b>TLR8</b>             | Toll like receptor 8                                             | AGTTTCCTCGTCTCGAGTTGCTTG  | AGAGGGTAGGTGGGAAATCCTGTT |
| <b>TLR9</b>             | Toll like receptor 9                                             | AACTGGCTGTTTCTGAAGTCTGTG  | AGGTGGGCAAAGTCAGAATCATGG |
| <b>MyD88</b>            | myeloid differentiation primary response 88                      | AGAAAGAGTTCCTCCAGCATCCTGA | CAAGGCGAGTCCAGAACCAAGATT |
| <b>TIRAP</b>            | TIR domain containing adaptor protein                            | GCGCAGGCCTTACATAGGAA      | CTGGCCAGGAGGATATTCGG     |
| <b>TRIF</b>             | TIR-domain-containing adapter-inducing interferon-β              | AGAAACCAGCACCAACTACCCA    | GGTCTTTGACAGAGCAGGGGTTTT |
| <b>TRAM</b>             | translocation associated membrane protein                        | TGGGTCTGCATGGACAATCT      | GGCCGCATGGGTATAACAGA     |
| <b>RIG-I</b>            | retinoic acid inducible gene I                                   | TTCTGATTGCCACCTCAGTTGC    | TCCTCTGCCTCTGGTTTGGATCAT |
| <b>MDA-5</b>            | melanoma differentiation-associated protein 5                    | AGGTCTGGGGCATGGAGAATAACT  | TGCCTGAATCACTGCCCATGTT   |
| <b>MAVS</b>             | mitochondrial antiviral-signaling protein                        | TGAACACAGTGGCCCTGAAAGT    | ACGGGTTGAGTTGATGGGCAAT   |
| <b>LGP2/DHX58</b>       | DExH-box helicase 58                                             | GGCACCCACCATGTCAATG       | CCCAGACCTCCCCACAGTT      |
| <b>DDX3</b>             | DEAD-box helicase 3                                              | CAGTTCAGGGTGGAGTTCTAGCAA  | CTGCCAATGCCATCGTAATCACTC |
| <b>cGAS</b>             | cyclic GMP-AMP synthase                                          | GAAGGCCTGCGCATTCAAACCT    | GAGAGAAGGATAGCCGCCATGTTT |
| <b>IFI16</b>            | gamma interferon inducible protein 16                            | GACCAGCCCTATCAAGAAAGAGGA  | TCTGGGAGTTACCTGACATTTGGC |
| <b>DAI</b>              | DNA-dependent activator of IFN-regulatory factors                | GGTGAAGGAATGCCAAGCAC      | CCTTCAGGATCAGTCCCGC      |
| <b>Ku70</b>             | -                                                                | GCATGCGTGGATTGTGCTC       | TAGTCTCCACTTGCTTCAAGGT   |
| <b>LRRFIP1</b>          | LRR binding FLII interacting protein 1                           | GAGCTCCGCTCTGCATTGGATAAA  | CAAGAGTGCCTCCGATTTGCT    |
| <b>MRE11</b>            | meiotic recombination 11 homolog                                 | GGGTCTCAAAGAGGAAGAGACAC   | GACATTTGCGGAAGGCTGCT     |
| <b>DDX41</b>            | DEAD-box helicase 41                                             | GCAGTCTGAGGAGTGAGCTTC     | CTACCCCTCAGATCAAGCCG     |
| <b>DHX9</b>             | DExH-box helicase 9                                              | AGCAATGCTGCCAGAGACTT      | GCGGAGATGCTACCCCAAAA     |
| <b>DHX36</b>            | DExH-box helicase 36                                             | AGTGCCATTTAGTTGCGGA       | TGTTTTCTTGCCAACCGACT     |
| <b>STING</b>            | stimulator of interferon genes                                   | CCATGGGCTGGCATGGTCATATTA  | AATATACAGCCGCTGGCTCACT   |
| <b>B-catenin</b>        | -                                                                | TTGTGCGGCGCCATTTAAG       | TCCTCAGACCTTCTCCGTC      |
| <b>AIM2</b>             | absent in melanoma 2                                             | TCGGCACAGTGGTTTCTTAGAGG   | TCGGGGTTTCACCAGCTTTTCT   |
| <b>NLRP1</b>            | NLR family pyrin domain containing 1                             | CTACGTTGGCCACTTGGGAT      | AGGTGAAGGTACGGCTATGC     |
| <b>NLRP3</b>            | NLR family pyrin domain containing 3                             | AAAGGAAGGCCGACACCTTGAT    | TGGCTGGTGCTCAGAAGTAAA    |
| <b>NLRC4</b>            | NLR family CARD domain containing 4                              | GAGGTCCCACAACCTCGTCAA     | GATTTCCCGCCAAATTCAAC     |
| <b>ASC</b>              | apoptosis-associated speck-like protein containing a CARD        | CGCGAGGGTCAAAAACGT        | TGCTCATCCGTGAGGACCTT     |
| <b>Caspase 1</b>        | -                                                                | AAAATCTCACTGCTTCGGACATG   | GGAACGTGCTGTCAGAGGTCTT   |
| <b>IRF1</b>             | interferon regulatory factor 1                                   | TTGTGCCGGACAGCACCAGT      | TCCACGTTTGTGGCTGCCACT    |
| <b>IRF3</b>             | interferon regulatory factor 3                                   | ACCCAGCCGTGGACCAAGAG      | TACCAAGGCCCTGAGGCAC      |
| <b>IRF4</b>             | interferon regulatory factor 4                                   | GACCGAAGCTGGAGGGACTA      | TGTCACCTGGCAACCATTTTC    |
| <b>IRF5</b>             | interferon regulatory factor 5                                   | TGTCAGTGCAAGGTGTTCTGGA    | TGTTGGTCTGGCCCTTTTGGAA   |
| <b>IRF7</b>             | interferon regulatory factor 7                                   | TGGTCTGGTGAAGCTGGAA       | GATGTCGTCATAGAGGCTGTTGG  |
| <b>NOD1</b>             | nucleotide-binding oligomerization domain-containing protein 1   | AGAGGCTCTGCGGAACCA        | TGTGGAGATGCCGTTGGA       |
| <b>NOD2</b>             | nucleotide-binding oligomerization domain-containing protein 2   | CCCTGCAGCTGGACTACAACCT    | AGATGCCTCGGTCTGAGATATTG  |
| <b>RIP2</b>             | receptor interacting serine/threonine kinase 2                   | CGCTGCTCGACAGTGAAAAGA     | TCAGGCTCATTGCAAATTCCTC   |
| <b>CARD9</b>            | caspase recruitment domain-containing protein 9                  | TTGAGAACTACCGCAGGAAGCG    | GGCTAGGAGCCCTCAGTGTC     |
| <b>Mincle</b>           | macrophage inducible Ca <sup>2+</sup> -dependent lectin receptor | ACGAGAAAATTTGTGCGCTGA     | CTGGGAAGAGGACCTGAGACT    |
| <b>Dectin-1/CLECL7A</b> | C-type lectin domain family 7 member A                           | TCAGGGGCTCTCAAGAACAA      | GAGGAGATGCAGCACACGAT     |
| <b>Dectin-2/CLEC6A</b>  | C-type lectin domain family 6 member A                           | AACACAGGGAGCCTGCATAAT     | ATCCCAGCCACAGACCAGAG     |
| <b>Syk</b>              | spleen tyrosine kinase                                           | TGAGCCTCACCAAAAACAGG      | ACAGCAAAACTGAAATCAATGGGT |
| <b>SOCS1</b>            | suppressor of cytokine signaling protein 1                       | CACCTCCGCACATTCCGTTT      | CAGTAGAATCCGCAGGCGTC     |
| <b>SOCS3</b>            | suppressor of cytokine signaling protein 3                       | CCATTCCGGGAGTTTCTGGAC     | TTGGCTTCTTGTGCTTGTGC     |
| <b>PD-1</b>             | programmed cell death 1                                          | AAACCCTGGTGGTTGGTGTC      | CTCCTATTGTCCCTCGTGCG     |
| <b>PD-L1</b>            | programmed cell death ligand 1                                   | CTGAACGCATTTACTGTCACGG    | AGACAATTAGTGACGCCAGGT    |
| <b>Tim1</b>             | T-cell immunoglobulin and mucin domain 1                         | ACTGGAGAAAAGCCGACGTG      | GGACCTCTGGGTTGGAAATGA    |
| <b>Tim3</b>             | T-cell immunoglobulin and mucin domain 3                         | CTACTGCTGCCGGATCCAAA      | GTCCCCTGGTGGTAAGCATC     |
| <b>Gal9</b>             | galectin 9                                                       | ACAGCCAAGTTGCTTTGGTTT     | AAAGGGGACAGCTGGACTCA     |
| <b>Tim4</b>             | T-cell immunoglobulin and mucin domain 4                         | GTCCTGCTGACATCCAAAGAGT    | TTGTTTTGTTCTGCTCAGGAACTG |
| <b>CD68</b>             | Cluster of differentiation 68                                    | AGGCTGGCTGTGCTTTTCTC      | CTCTGTAACCGTGGGTGTCA     |
| <b>L-SIGN</b>           | liver/lymph node-specific ICAM-3-grabbing integrin               | GACTGCATTTGAACGCCTGT      | TGACGGAGTTGTGCCAGTTC     |
| <b>α-SMA</b>            | α-smooth muscle actin                                            | GTGTTGCCCTGAAGAGCAT       | GCTGGGACATTGAAAGTCTCA    |
| <b>NTCP</b>             | sodium-taurocholate cotransporting polypeptide                   | TGACCACCTGCTCCACCTTC      | GAATGAGAACCAGGACCAGTGAT  |

**Table 1: Primers sequences.**

| <b>Target protein</b> | <b>Name</b>                      | <b>Reference</b>          | <b>Stimulated Control</b>        |
|-----------------------|----------------------------------|---------------------------|----------------------------------|
| <b>TLR1</b>           | Polyclonal anti-TLR1 antibody    | PA5-11589 (Thermo Fisher) | THP1 + PAM3CSK4                  |
| <b>TLR2</b>           | Monoclonal anti-TLR2 antibody    | #12276 (Cell Signaling)   | THP1 + PAM3CSK4                  |
| <b>TLR3</b>           | Monoclonal anti-TLR3 antibody    | #6961 (Cell Signaling)    | LMNC + Riboxsol                  |
| <b>TLR4</b>           | Monoclonal anti-TLR4 antibody    | sc-293072 (Santa Cruz)    | THP1 + LPS                       |
| <b>TLR5</b>           | Monoclonal anti-TLR5 antibody    | Ab168382(Abcam)           | THP1 + LPS                       |
| <b>TLR7</b>           | Monoclonal anti-TLR7 antibody    | #5632 (Cell Signaling)    | THP1 + Imiquimod (R837)          |
| <b>TLR8</b>           | Monoclonal anti-TLR8 antibody    | #11886 (Cell Signaling)   | LMNC + ssRNA40/Lyovec            |
| <b>TLR9</b>           | Monoclonal anti-TLR9 antibody    | #13674 (Cell Signaling)   | pDC                              |
| <b>RIG-I</b>          | Monoclonal I anti-RIG-I antibody | #3743 (Cell Signaling)    | HepaRG + Poly(I:C) (LMNC)/Lyovec |
| <b>MDA-5</b>          | Monoclonal anti-MDA5 antibody    | #5321 (Cell Signaling)    | HepaRG + Poly(I:C) (LMNC)/Lyovec |
| <b>cGAS</b>           | Monoclonal anti-cGAS antibody    | #15102 (Cell Signaling)   | THP1 + STING                     |
| <b>STING</b>          | Monoclonal anti-STING antibody   | #13647 (Cell Signaling)   | THP1 + STING                     |
| <b>PD-1</b>           | Polyclonal anti-PD1 antibody     | PA5-20350 (Thermo Fisher) | THP1 + PAM3CSK4                  |
| <b>PD-L1</b>          | Polyclonal anti-PDL1 antibody    | PA5-28115 (Thermo Fisher) | THP1 + PAM3CSK4                  |
| <b>IFI16</b>          | Monoclonal anti-IFI16 antibody   | Ab169788 (Abcam)          | THP1 + Imiquimod (R837)          |
| <b>MyD88</b>          | Monoclonal anti-Myd88 antibody   | #4283 (Cell Signaling)    | THP1 + PAM3CSK4                  |
| <b>TRIF</b>           | Polyclonal anti-TRIF antibody    | #4596 (Cell Signaling)    | LMNC + Riboxsol                  |
| <b>MAVS</b>           | Polyclonal anti-MAVS antibody    | #3993 (Cell Signaling)    | HepaRG + Poly(I:C) (LMNC)/Lyovec |

**Table 2: Antibodies and controls used for western blot analysis.**

| <b>PRR</b>       | <b>Ligand</b>          | <b>Reference</b> | <b>Concentration</b> |
|------------------|------------------------|------------------|----------------------|
| <b>TLR1/2</b>    | PAM3CSK4               | t1rl-pms         | 0,5 µg/ml            |
| <b>TLR2/6</b>    | FSL-1                  | t1rl-fsl         | 1 µg/ml              |
| <b>TLR3</b>      | Poly(I:C) (HMW)        | t1rl-pic         | 5 µg/ml              |
| <b>TLR3</b>      | Riboxsol               | A-00102          | 5 µg/ml              |
| <b>TLR4</b>      | LPS SM                 | t1rl-smlps       | 0,5 µg/ml            |
| <b>TLR7</b>      | Imiquimod (R837)       | t1rl-imq         | 5 µg/ml              |
| <b>TLR8</b>      | ssRNA40/Lyovec         | t1rl-lrna40      | 1 µg/ml              |
| <b>TLR9</b>      | ODN 2395               | t1rl-2395        | 5 µM                 |
| <b>RIGI/MDA5</b> | Poly(I:C) (LMW)/Lyovec | t1rl-picwlv      | 0,025 µg/ml          |
| <b>STING</b>     | 2'3'-cGAMP             | t1rl-cga23       | 5 µg/ml              |

**Table 3: Ligands and concentration used for PRR stimulation.**
